# Supplementary material for: Activating the Wnt/β-Catenin Pathway for the Treatment of Melanoma – Application of LY2090314, a Novel Selective Inhibitor of Glycogen Synthase Kinase-3
Source: PubMed Central journal article supplement (PMC4411090; doi:10.1371/journal.pone.0125028), 2015-04-27
Supplement: pone.0125028.s001.pdf [file pone.0125028.s001.pdf]

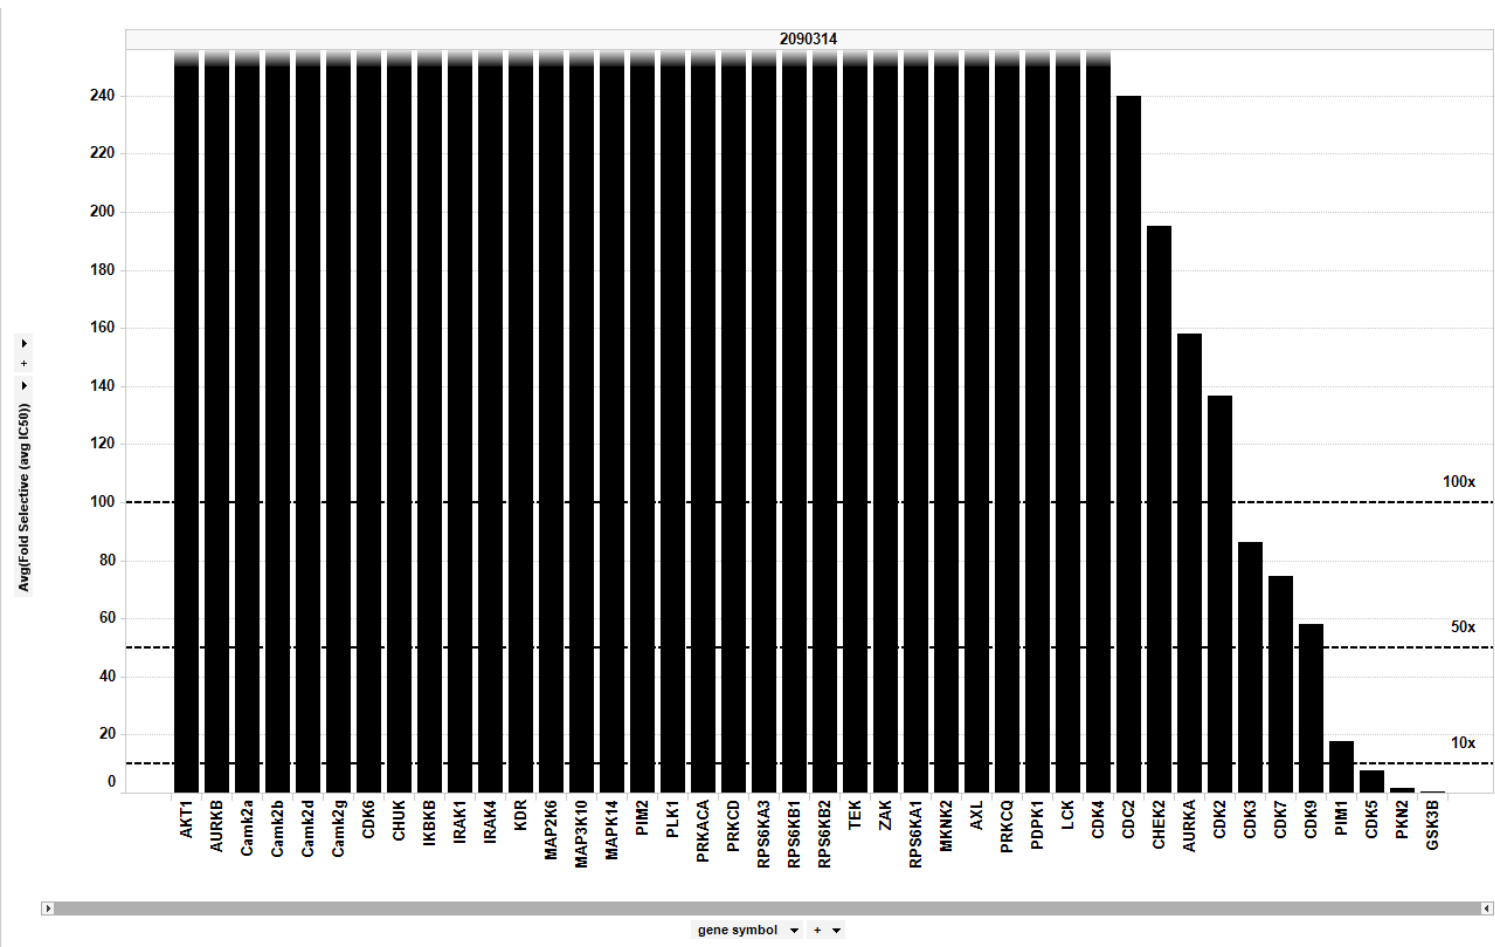

**Figure S1. LY2090314 selectivity profile.** Single point (20uM) percentage inhibition studies were performed for 200 kinases and IC50 experiments conducted for 44 enzymes. Fold selectivity relative to GSK3 $\beta$  is represented in the figure.
