# Supplementary material for: Activating the Wnt/β-Catenin Pathway for the Treatment of Melanoma – Application of LY2090314, a Novel Selective Inhibitor of Glycogen Synthase Kinase-3
Source: PubMed Central journal article supplement (PMC4411090; doi:10.1371/journal.pone.0125028), 2015-04-27
Supplement: pone.0125028.s002.pdf [file pone.0125028.s002.pdf]

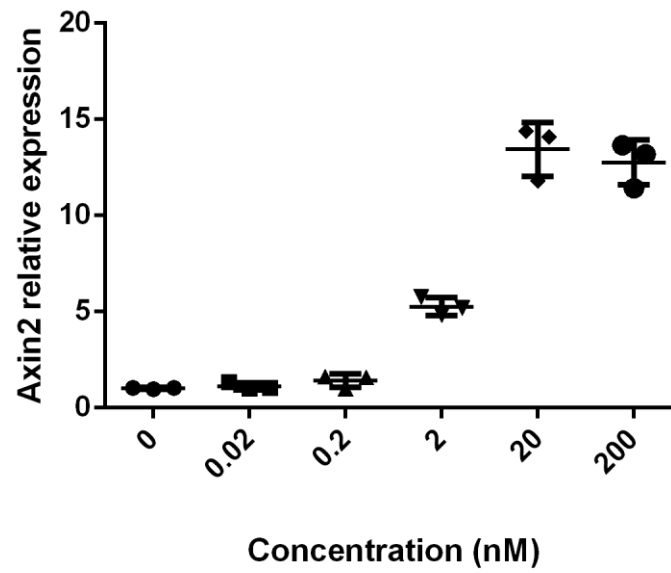

**Figure S2.** LY2090314 treatment of A375 cells increased Axin2 gene expression in a dose dependent manor.
