# Supplementary material for: Activating the Wnt/β-Catenin Pathway for the Treatment of Melanoma – Application of LY2090314, a Novel Selective Inhibitor of Glycogen Synthase Kinase-3
Source: PubMed Central journal article supplement (PMC4411090; doi:10.1371/journal.pone.0125028), 2015-04-27
Supplement: pone.0125028.s003.pdf [file pone.0125028.s003.pdf]

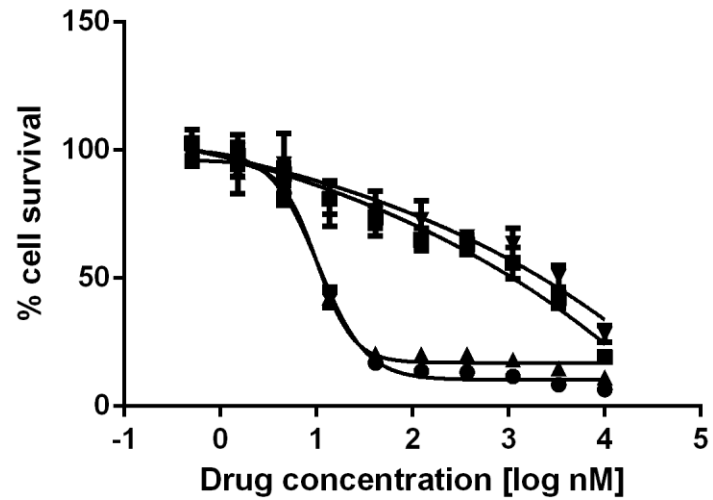

**Figure S3. A dominant/negative TCF4 construct renders cells insensitive to LY2090314..** Dominant/negative TCF4 was delivered to cells using lentivirus. Following selection, cytotoxicity assays were performed with LY2090314 according to materials and methods (● A375 control; ■ A375 TCF4 DN; ▲ M14 control; ▼ M14 TCF4 DN).
