# Supplementary material for: Activating the Wnt/β-Catenin Pathway for the Treatment of Melanoma – Application of LY2090314, a Novel Selective Inhibitor of Glycogen Synthase Kinase-3
Source: PubMed Central journal article supplement (PMC4411090; doi:10.1371/journal.pone.0125028), 2015-04-27
Supplement: pone.0125028.s004.pdf [file pone.0125028.s004.pdf]

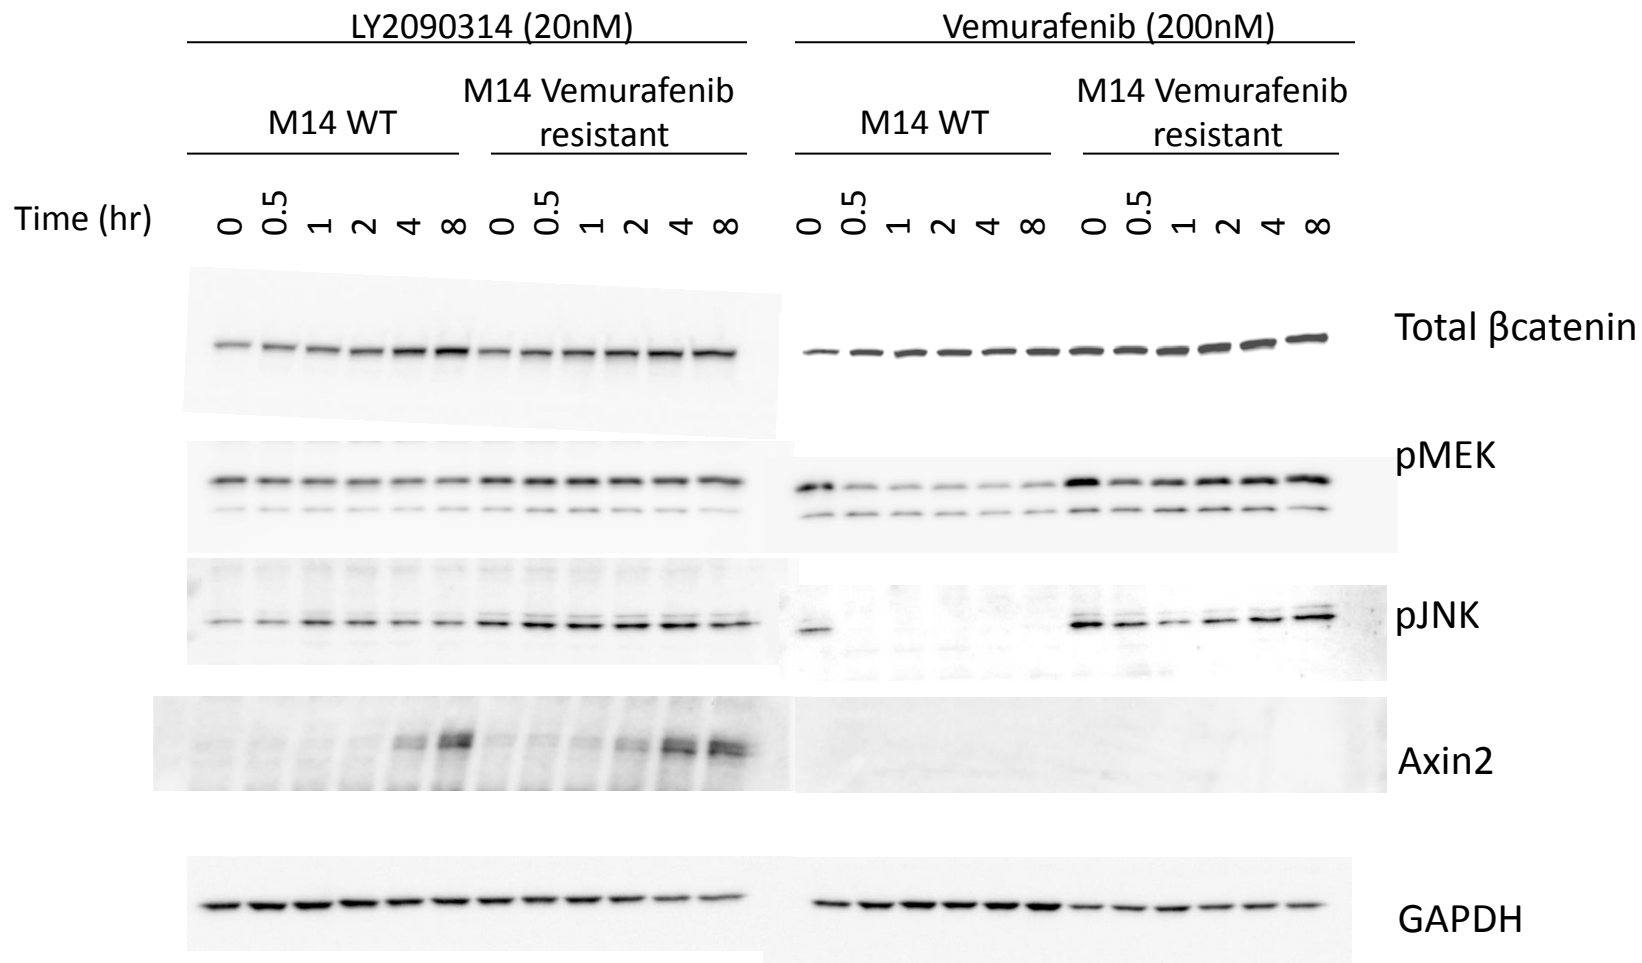

**Figure S4. LY2090314 and vemurafenib have distinct mechanisms of action.** Following drug treatment, cells were analyzed for compound effect on the Wnt and Ras pathways and demonstrate differential signaling pathway modulation.
