# Supplementary material for: Activating the Wnt/β-Catenin Pathway for the Treatment of Melanoma – Application of LY2090314, a Novel Selective Inhibitor of Glycogen Synthase Kinase-3
Source: PubMed Central journal article supplement (PMC4411090; doi:10.1371/journal.pone.0125028), 2015-04-27
Supplement: pone.0125028.s005.pdf [file pone.0125028.s005.pdf]

A

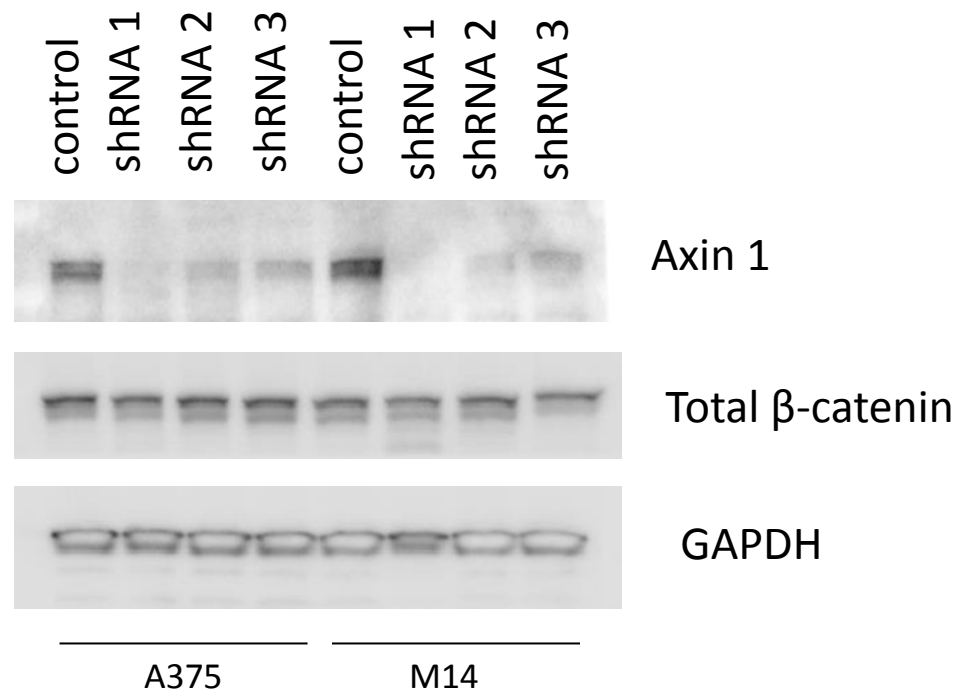

B

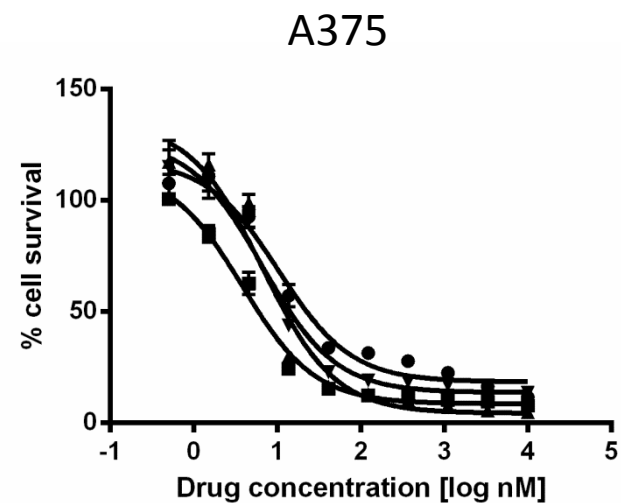

C

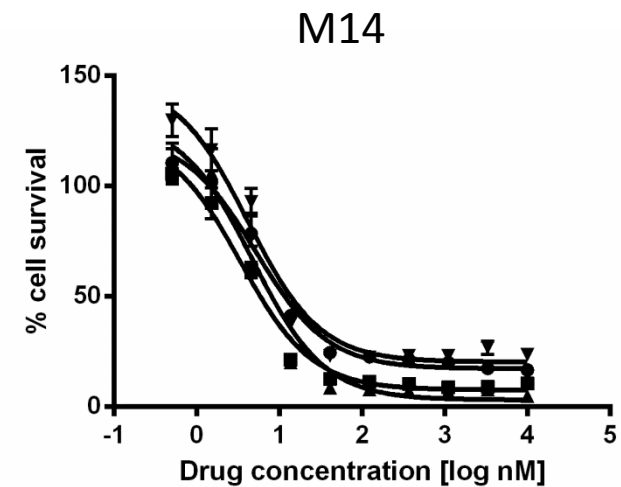

**Figure S5. Cell death induced by LY2090314 is not dependent on Axin1.** A. Melanoma cells stably transfected with shRNAs targeting Axin1 display decreased Axin1 protein expression by western blot. A375 (B) and M14 (C) cells expressing shRNAs targeting Axin1 (● Control; ■ Axin1 shRNA 1; ▲ Axin1 shRNA 2; ▼ Axin1 shRNA 3) retain sensitivity to LY2090314 suggesting Axin1 does not play a role in the apoptotic response to compound treatment.
