# Supplementary material for: Activating the Wnt/β-Catenin Pathway for the Treatment of Melanoma – Application of LY2090314, a Novel Selective Inhibitor of Glycogen Synthase Kinase-3
Source: PubMed Central journal article supplement (PMC4411090; doi:10.1371/journal.pone.0125028), 2015-04-27
Supplement: pone.0125028.s006.pdf [file pone.0125028.s006.pdf]

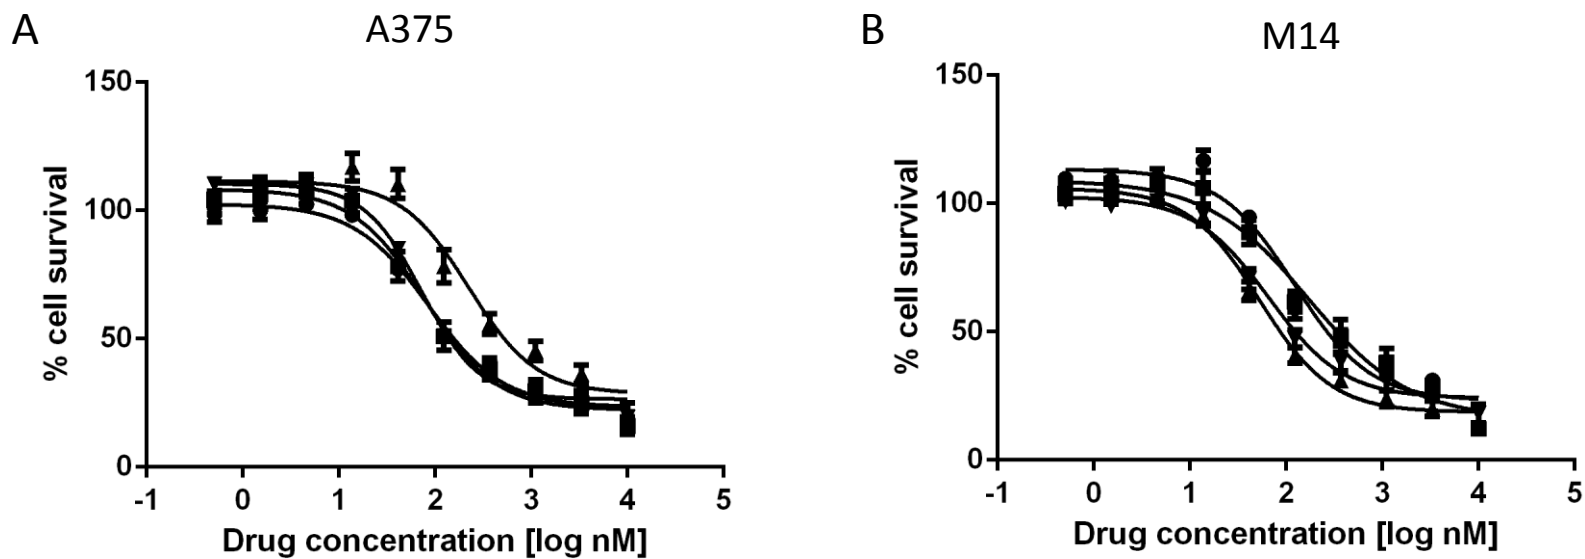

**Figure S6. Cell death induced by Vemurafenib is not dependent on  $\beta$ -catenin.** Melanoma cells stably transfected with shRNAs targeting  $\beta$ -catenin display decreased  $\beta$ -catenin protein expression by western blot (Figure 3). A375 (**A**) and M14 (**B**) cells expressing shRNAs targeting  $\beta$ -catenin (● Control; ■  $\beta$ -catenin shRNA 1; ▲  $\beta$ -catenin shRNA 2; ▼  $\beta$ -catenin shRNA 3) retain sensitivity to vemurafenib suggesting  $\beta$ -catenin does not play a role in the apoptotic response to compound treatment.
