# Supplementary material for: Activating the Wnt/β-Catenin Pathway for the Treatment of Melanoma – Application of LY2090314, a Novel Selective Inhibitor of Glycogen Synthase Kinase-3
Source: PubMed Central journal article supplement (PMC4411090; doi:10.1371/journal.pone.0125028), 2015-04-27
Supplement: pone.0125028.s007.pdf [file pone.0125028.s007.pdf]

| Cell line  | Relative IC50 (μM) | Tumor type                   |
|------------|--------------------|------------------------------|
| HCT116     | 10.48              | Colorectal adenocarcinoma    |
| COLO205    | 11.30              |                              |
| RKO        | >20                |                              |
| COLO320    | >20                |                              |
| A549       | 9.96               | Lung carcinoma               |
| H2030      | 9.44               |                              |
| H460       | 13.25              | Large cell lung carcinoma    |
| SK-MES-1   | >20                | Squamous cell lung carcinoma |
| SKBR3      | >20                | Breast adenocarcinoma        |
| MDA-MB-231 | >20                |                              |
| MDA-MB-468 | 0.45               |                              |
| MCF7       | >20                |                              |
| BxPC3      | 0.43               | Prostate adenocarcinoma      |
| LNCaP      | 0.15               |                              |
| DU145      | 5.52               |                              |

**Table S1. LY2090134 relative IC50 values in a panel of human tumor cell lines** . Cell lines were treated for 72 hours in an exponential phase of growth and the IC50 determined using a cell viability method, CellTiter-Glo (see materials and methods).
